# Supplementary material for: The Merkel Cell Polyomavirus T-Antigens and IL-33/ST2-IL1RAcP Axis: Possible Role in Merkel Cell Carcinoma
Source: MDPI journal article supplement (doi:10.3390/ijms23073702), 2022-03-28
Supplement: s1 [file s1]

**Supplementary Table S1. Primary antibodies used in this study**

| Antibody                                                       | Supplier                                       | Method* |
|----------------------------------------------------------------|------------------------------------------------|---------|
| monoclonal mouse MCPyV LTA                                     | Sc-136172, Santa Cruz Biotechnologies          | IHC     |
| mouse IL33 monoclonal antibody (Nessy-1)                       | cat.#ALX-804-840, Enzo                         | IHC     |
| Rabbit CK-20 monoclonal antibody (SP33)                        | cat.#790-4431, Roche                           | IHC     |
| mouse IL33 monoclonal antibody (4E9)                           | cat.#ab72844, abcam                            | WB      |
| rabbit anti-ST2                                                | cat.# PRS3363, Sigma-Aldrich                   | IHC     |
| rabbit IL1RAcP/IL-1R3 polyclonal antibody                      | cat.#NBP2-16946, novusbio                      | WB      |
| rabbit polyclonal IL-1 RAcP/IL-1 R3 antibody                   | cat.# NBP1-76464                               | IHC     |
| monoclonal rabbit keratin 20                                   | cat.# 13063, Cell Signaling, Danvers, MA, USA  |         |
| monoclonal rabbit Phospho-p44/42 MAPK (Erk1/2) (Thr202/Tyr204) | cat.#4370, Cell Signaling                      | WB      |
| monoclonal rabbit p44/42 MAPK (Erk1/2)                         | cat.#4695S, Cell Signaling                     | WB      |
| Phospho-SAPK/JNK (Thr183/Tyr185) (81E11) rabbit mAb            | cat.#4668, Cell Signaling                      | WB      |
| SAPK/JNK rabbit polyclonal antibody                            | cat.#9252, Cell Signaling                      | WB      |
| Phospho-p38 MAPK (Thr180/Tyr182)                               | cat.#9211, Cell Signaling                      | WB      |
| Phospho-NF- <b>KB</b> p65 (Ser536) (93H1) Rabbit mAb           | cat.##3033, Cell Signaling                     | WB      |
| Phospho-NF- <b>KB</b> p105 (Ser933) (18E6)                     | cat.#4806S, Cell Signaling                     | WB      |
| rabbit anti-GAPDH                                              | cat.# G9545, Sigma Aldrich, St. Louis, MO, USA | WB      |
| goat ST2/IL-33 R polyclonal antibody                           | cat.#AF523, R&D systems                        | B       |
| polyclonal normal goat IgG control                             | cat.#AB-108-C, R&D systems                     | B.Ctrl  |

\*IHC: immunohistochemistry; WB: western blot; B: blocking; B.Ctrl: blocking control

**Supplementary Table S2. List of primers used to clone expression plasmids in pCMV3\_His(N)\_FLAG(C)\*.**

| Sr.# | Plasmid Name         | Forward Primer(5'→3')          | Reverse Primer (5'→3')         |
|------|----------------------|--------------------------------|--------------------------------|
| 1    | IL33(1-270aa)        | GGTAGCGCTAGCATGAAGCCTAAAATGAAG | TCCATaACCGGTAGAGTTTCAGAGAGCTTA |
| 2    | IL33(112-270aa)      | GGTAGCGCTAGCATGAGTATCACAGGAATT | TCCATaACCGGTAGAGTTTCAGAGAGCTTA |
| 3    | IL33(1-65aa)         | GGTAGCGCTAGCATGAAGCCTAAAATGAAG | CCCTAAACCGGTAGGGTGGTTTCTCTCCTA |
| 4    | IL33(1-111aa)        | GGTAGCGCTAGCATGAAGCCTAAAATGAAG | CCCTAAACCGGTAGTGAATCATGAAGTGCT |
| 5    | IL33(1-65,112-270aa) | Synthesize from GeneScript     |                                |
| 6    | IL33(66-111aa)       | GGTAGCGCTAGCATGAAAAGGCCTTCACTG | CCCTAAACCGGTAGTGAATCATGAAGTGCT |
| 7    | IL33(66-270aa)       | GGTAGCGCTAGCATGAAAAGGCCTTCACTG | TCCATaACCGGTAGAGTTTCAGAGAGCTTA |
| 8    | ST2L*                | GGCTAGCATGGGGTTTGGATCTTAG      | CACCGGTAGTTGCTTCTGGGCAGCC      |
| 9    | sST2*                | GGCTAGCATGGGGTTTGGATCTTAG      | CACCGGTAGGAAACACTCCTTACTTGG    |
| 10   | IL1RAcP.L *          | GGCTAGCATGACACTTCTGTGGTGTG     | CACCGGTAGTACATTTTCAAAGATGAATAC |
| 11   | sIL1RAcP*            | GGCTAGCATGACACTTCTGTGGTGTG     | CACCGGTAGCTGACCGCATCTATTACC    |

\* His(N): His Tag on N-terminal; FLAG(C): FLAG tag on C-terminal; L: membrane bound receptor; s: soluble form of receptor

**Supplementary Table S3. List of primers used to synthesize luciferase promoter plasmids.**

| Sr.# |                          | Forward Primer(5'→3')                               | Reverse Primer(5'→3')                                  |
|------|--------------------------|-----------------------------------------------------|--------------------------------------------------------|
| 1    | pGL3_IL33(-1050/+50)     | AGTCACGGTACCATTAAAGGGGATTACTGCACAGAAAATGAAAC<br>AAC | AGTCACAAGCTTTTTCTTCCCTGAAGAGCTGCAGCTCTGTGTTTCGGA<br>GG |
| 2    | pGL3_IL33 (-656/+50)     | CCAAGTCTTAAAAGAGCGGTACCTCATCCC                      | GGGATGAGGTACCGCTCTTTTAAGACTTGG                         |
| 3    | pGL3_IL33 (-598/+50)     | GAGGGTGAGTGGTACCAAAATTTCTCATGAGG                    | CCTCATGAGAAATTTTGGTACCACTCACCTC                        |
| 4    | pGL3_IL33 (-460/+50)     | GGGGAGCAGGTACCCCCGTCAGATATGTTGG                     | CCAACATATCTGACGGGGGTACCTGCTCCCC                        |
| 5    | pGL3_IL33 (-210/+50)     | GTTCAACTCCAAAGGGTACCAAAACATAAAAGTTTAGG              | CCTAAACTTTATGTTTGGTACCCTTTGGAGTTGAAC                   |
| 6    | pGL3_IL33 (-160/+50)     | GCTGGTTTAAGGTACCCAGATGGAGGGAGG                      | CCTCCCTCCATCTGGGTACCTTAAACCAGC                         |
| 7    | mutLT1                   | CTTTTTCTGCTCCGCGTTTGTTC AAG                         | CCTTGAAACAAACGCGGAGCAGAAAAAAG                          |
| 8    | mutLT2                   | GAATGGATGTAGATCTTTGCTAGGGTAAC                       | GTTACCCTAGCAAAGATCTACATCCATTC                          |
| 9    | mutLT3                   | GCCAAAACATAAAAGTTTAGCGCCAGAAGAAGAATC                | GATTCTTCTTCTGGCGCTAAACTTTATGTTTGGC                     |
| 10   | pGL3_ST2L(-100/+84)      | GGCTCGAGGGTGAAAACGCAGTTAACATTTG                     | CCAAGCTTCTGCCCACAGTTTCACAACTCAGAAAGCCA                 |
| 11   | pGL3_sST2(-499/+100)     | TTTGGTACCTGGGATGGGGTGGAGTCACATTC                    | TTTCTCGAGGATAAGTAATTGATGCTTACC                         |
| 12   | pGL3_IL1RAcP(-1397/+182) | GGTACCTGACAATGTTGTGAGCAGGTG                         | CCAAGCTTTTCTGCGGCTTGGTGACTTCT                          |
| 13   | pGL3_IL1RAcP(-517/+182)  | GGTACCGGTGGTTGCGAAAATCGTGCA                         | CCAAGCTTTTCTGCGGCTTGGTGACTTCT                          |

**Supplementary Table S4. Association of IL-33, ST2/IL1RL1 and IL1AcP expression with clinicopathological factors in Merkel cell carcinoma.**

| Variable | IL33     |          |          |   | ST2/IL1RL1 |          |          |   | IL1AcP   |          |          |   |
|----------|----------|----------|----------|---|------------|----------|----------|---|----------|----------|----------|---|
|          | 0+1      | 2        | 3        | P | 0+1        | 2        | 3        | P | 0+1      | 2        | 3        | P |
|          | n=20 (%) | n=47 (%) | n=51 (%) |   | n=43 (%)   | n=44 (%) | n=39 (%) |   | n=44 (%) | n=44 (%) | n=29 (%) |   |

|           |           |           |           |       |           |           |           |       |           |           |           |       |
|-----------|-----------|-----------|-----------|-------|-----------|-----------|-----------|-------|-----------|-----------|-----------|-------|
| MCPyV DNA |           |           |           | .165  |           |           |           | .010  |           |           |           | .011  |
| negative  | 4 (12.1)  | 19 (57.6) | 10 (30.3) |       | 16 (88.5) | 10 (30.3) | 7 (21.2)  |       | 20 (64.5) | 7 (22.6)  | 4 (12.9)  |       |
| positive  | 5 (8.8)   | 23 (40.4) | 29 (50.9) |       | 13 (19.7) | 26 (39.4) | 27 (40.9) |       | 20 (31.7) | 30 (47.6) | 13 (20.6) |       |
| NA        | 11        | 5         | 12        |       | 14        | 8         | 5         |       | 4         | 7         | 12        |       |
|           |           |           |           |       |           |           |           |       |           |           |           |       |
| MCPyV LT  |           |           |           | .622  |           |           |           | .073  |           |           |           | .040  |
| negative  | 5 (11.4)  | 19 (43.2) | 20 (45.5) |       | 20 (44.4) | 15 (33.3) | 10 (22.2) |       | 21 (50)   | 10 (23.8) | 11 (26.2) |       |
| positive  | 13 (18.1) | 28 (38.9) | 31 (43.1) |       | 20 (25.6) | 29 (37.2) | 29 (37.2) |       | 22 (29.7) | 34 (45.9) | 18 (24.3) |       |
| NA        | 2         | 0         | 0         |       | 3         | 0         | 0         |       | 1         | 0         | 0         |       |
|           |           |           |           |       |           |           |           |       |           |           |           |       |
| Sex       |           |           |           | .576  |           |           |           | .319  |           |           |           | .163  |
| Female    | 14 (17.1) | 35 (42.7) | 33 (40.2) |       | 27 (31.0) | 34 (39.1) | 26 (29.9) |       | 33 (40.7) | 32 (39.5) | 16 (19.8) |       |
| Male      | 6 (16.7)  | 12 (33.3) | 18 (50.0) |       | 16 (41.0) | 10 (25.6) | 13 (33.3) |       | 11 (30.6) | 12 (33.3) | 13 (36.1) |       |
|           |           |           |           |       |           |           |           |       |           |           |           |       |
| Location  |           |           |           | .638* |           |           |           | .464* |           |           |           | .003* |
| Head      | 11 (17.7) | 24 (38.7) | 27 (43.5) |       | 25 (37.9) | 24 (36.4) | 17 (25.8) |       | 33 (52.4) | 19 (30.2) | 11 (17.5) |       |
| Limb      | 6 (14.6)  | 19 (46.3) | 16 (39.0) |       | 13 (30.2) | 15 (34.9) | 15 (34.9) |       | 6 (15.0)  | 21 (52.5) | 13 (32.5) |       |
| Trunk     | 0 (0)     | 4 (40.0)  | 6 (60.0)  |       | 2 (16.7)  | 4 (33.3)  | 6 (50.0)  |       | 4 (36.4)  | 4 (36.4)  | 3 (27.3)  |       |
| NA        | 3         | 0         | 2         |       | 3         | 1         | 1         |       | 1         | 0         | 2         |       |
|           |           |           |           |       |           |           |           |       |           |           |           |       |
| Stage #   |           |           |           | .523  |           |           |           | .149  |           |           |           | .642  |
| 1 and 2   | 9 (12.0)  | 31 (41.3) | 35 (46.7) |       | 21 (27.6) | 32 (42.1) | 23 (30.3) |       | 26 (35.1) | 31 (41.9) | 17 (23.0) |       |
| 3 and 4   | 4 (20.0)  | 6 (30.0)  | 10 (50.0) |       | 10 (50.0) | 5 (25.0)  | 5 (25.0)  |       | 5 (27.8)  | 7 (38.9)  | 6 (33.3)  |       |
| NA        | 7         | 10        | 6         |       | 12        | 7         | 11        |       | 13        | 6         | 6         |       |
|           |           |           |           |       |           |           |           |       |           |           |           |       |
| IL33      |           |           |           |       |           |           |           | .036  |           |           |           | .224  |

|                 |           |           |           |      |           |           |           |      |           |           |           |      |
|-----------------|-----------|-----------|-----------|------|-----------|-----------|-----------|------|-----------|-----------|-----------|------|
| negative or low |           |           |           |      | 11 (61.1) | 3 (16.7)  | 4 (22.2)  |      | 6 (37.5)  | 7 (43.8)  | 3 (18.8)  |      |
| intermediate    |           |           |           |      | 15 (34.9) | 15 (34.9) | 13 (30.2) |      | 19 (44.2) | 17 (39.5) | 7 (16.3)  |      |
| high            |           |           |           |      | 10 (20.4) | 21 (42.9) | 18 (36.7) |      | 13 (27.7) | 17 (36.2) | 17 (36.2) |      |
| NA              |           |           |           |      | 7         | 4         | 4         |      | 6         | 3         | 2         |      |
|                 |           |           |           |      |           |           |           |      |           |           |           |      |
| ST2/IL1RL1      |           |           |           | .036 |           |           |           |      | 19 (61.3) | 8 (25.8)  | 4 (12.9)  | .016 |
| negative or low | 11 (30.6) | 15 (41.7) | 10 (27.8) |      |           |           |           |      | 12 (29.3) | 16 (39.0) | 13 (31.7) |      |
| intermediate    | 3 (7.7)   | 15 (38.5) | 21 (53.8) |      |           |           |           |      | 9 (24.3)  | 18 (48.6) | 10 (27.0) |      |
| high            | 4 (11.4)  | 13 (37.1) | 18 (51.4) |      |           |           |           |      | 4         | 2         | 2         |      |
| NA              | 2         | 4         | 2         |      |           |           |           |      |           |           |           |      |
|                 |           |           |           |      |           |           |           |      |           |           |           |      |
| IL1AcP          |           |           |           | .224 |           |           |           | .016 |           |           |           |      |
| negative or low | 6 (15.8)  | 19 (50.0) | 13 (34.2) |      | 19 (47.5) | 12 (30.0) | 9 (22.5)  |      |           |           |           |      |
| intermediate    | 7 (17.1)  | 17 (41.5) | 17 (41.5) |      | 8 (19.0)  | 16 (38.1) | 18 (42.9) |      |           |           |           |      |
| high            | 3 (11.1)  | 7 (30.4)  | 17 (73.9) |      | 4 (14.8)  | 13 (48.1) | 10 (37.0) |      |           |           |           |      |
| NA              | 4         | 4         | 4         |      | 12        | 3         | 2         |      |           |           |           |      |
|                 |           |           |           |      |           |           |           |      |           |           |           |      |

\*Fisher Freeman Halton test. Frequency tables were analyzed with the Chi-square and Fisher-Freeman-Halton tests and continuous variables were investigated with the Kruskal-Wallis test. The Kaplan-Meier method was used to estimate survival utilizing the time from the diagnosis of MCC to death from any cause (overall survival) or from MCC (disease-specific survival) and survival between the groups was calculated using the log-rank test.
